## CORRECTION

# Correction: Correction: Clinical features of 2041 human brucellosis cases in China

The *PLOS ONE* Staff

The affiliation for the twelfth author is incorrect. Hongjie Yu is not affiliated with #4 but with #1 and #5:

Division of Infectious Diseases, Key Laboratory of Surveillance and Early-warning on Infectious Disease, Chinese Center for Disease Control and Prevention, Beijing, China.

School of Public Health, Fudan University, Key Laboratory of Public Health Safety, Ministry of Education, Shanghai, China. The publisher apologizes for the error.

## References

1. Shi Y, Gao H, Pappas G, Chen Q, Li M, Xu J, et al. (2018) Clinical features of 2041 human brucellosis cases in China. *PLoS ONE* 13(11): e0205500. <https://doi.org/10.1371/journal.pone.0205500> PMID: 30476930
2. The *PLOS ONE* Staff (2019) Correction: Clinical features of 2041 human brucellosis cases in China. *PLoS ONE* 14(1): e0211102. <https://doi.org/10.1371/journal.pone.0211102> PMID: 30650152

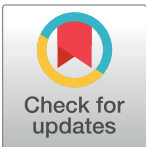

## OPEN ACCESS

**Citation:** The *PLOS ONE* Staff (2019) Correction: Correction: Clinical features of 2041 human brucellosis cases in China. *PLoS ONE* 14(3): e0213558. <https://doi.org/10.1371/journal.pone.0213558>

**Published:** March 4, 2019

**Copyright:** © 2019 The *PLOS ONE* Staff. This is an open access article distributed under the terms of the [Creative Commons Attribution License](https://creativecommons.org/licenses/by/4.0/), which permits unrestricted use, distribution, and reproduction in any medium, provided the original author and source are credited.
